# Supplementary material
Source: publisher site journal article supplement (https://www.dovepress.com/article/163335)
Supplement: Supplementary file 1 [file get_supplementary_file.php%3Ff%3D163335.pdf]

Supplementary Table 1 The clinical-pathological data of the melanoma and pigmented nevi patients

| Clinical groups       |         | No. of cases |                |
|-----------------------|---------|--------------|----------------|
|                       |         | Melanoma     | Pigmented nevi |
| Sex                   | Male    | 20           | 16             |
|                       | Female  | 16           | 20             |
| Age                   | ≥60     | 19           | 16             |
|                       | <60     | 17           | 20             |
| Subtype               | Acral   | 9            | --             |
|                       | Mucosal | 8            | --             |
|                       | CSD     | 15           | --             |
|                       | NCSD    | 4            | --             |
| Lymph node metastasis | Yes     | 16           | --             |
|                       | No      | 20           | --             |
| Distant metastasis    | Yes     | 5            | --             |
|                       | No      | 31           | --             |
| Ulcer                 | Yes     | 9            | --             |
|                       | No      | 27           | --             |

Supplementary Table 2 Primer sequences used for q-PCR

| Name                             | Primer sequences                                               |
|----------------------------------|----------------------------------------------------------------|
| miR-497-5p (stem-loop RT primer) | 5'-GTCGTATCCAGTGCAGGGTCCGAGGT<br>ATTCGCACTGGATACGACACCAAACA-3' |
| miR-195-5p (stem-loop RT primer) | 5'-GTCGTATCCAGTGCAGGGTCCGAGGT<br>ATTCGCACTGGATACGACTATAACCG-3' |
| miR-455-3p (stem-loop RT primer) | 5'-GTCGTATCCAGTGCAGGGTCCGAGGT<br>ATTCGCACTGGATACGACTCTAACAC-3' |
| miR-497-5p (Forward)             | 5'-TGCGCCAGCAGCACACTGTGG-3'                                    |
| miR-195-5p (Forward)             | 5'-TGCGCTAGCAGCACAGAAATA-3'                                    |
| miR-455-3p (Forward)             | 5'-TGCGCCAAACCACACTGTGGTG-3'                                   |
| Universal reverse primer         | 5'-CCAGTGCAGGGTCCGAGGTATT-3'                                   |
| hTERT (Forward)                  | 5'-TACTGCGTGCGTCGGTATG-3'                                      |
| hTERT (Reverse)                  | 5'-ATGTACGGCTGGAGGTCTGTC-3'                                    |
| U6 (Forward)                     | 5'-CGCTTCGGCAGCACATATAC-3'                                     |
| U6 (Reverse)                     | 5'-AAATATGGAACGCTTCACGA-3'                                     |
| GAPDH (Forward)                  | 5'-TCAAGAAGGTGGTGAAGCAGG-3'                                    |
| GAPDH (Reverse)                  | 5'-TCAAAGGTGGAGGAGTGGGT-3'                                     |

Supplementary Table 3 The sequences of miRNAs mimics/inhibitor/negative controls

| Name                       | Sequences                                             |
|----------------------------|-------------------------------------------------------|
| miR-497-5p mimics          | 5'-CAGCAGCACACUGUGGUUUGUAAACCAC<br>AGUGUGCUGCUGUU-3'  |
| miR-497-5p inhibitor       | 5'-ACAAACCACAGUGUGCUGCUG-3'                           |
| miR-195-5p mimics          | 5'-UAGCAGCACAGAAUAUUGGCCAAUAUU<br>UCUGUGCUGCUAUU-3'   |
| miR-195-5p inhibitor       | 5'-GCCAAUAUUUCUGUGCUGCUA-3'                           |
| miR-455-3p mimics          | 5'-GCAGUCCAUGGGCAUAUACACGUUAUAUG<br>CCCAUGGACUGCUU-3' |
| miR-455-3p inhibitor       | 5'-GUGUAUAUGCCCAUGGACUGC-3'                           |
| mimics negative control    | 5'-UUCUCCGAACGUGUCACGUTT-3'                           |
| inhibitor negative control | 5'-CAGUACUUUUGUGUAGUACAA-3'                           |

Supplementary Table 4 The expression levels of 14 candidate miRNAs in melanoma and pigmented nevi tissues using Custom miRNA PCR Array

| No. | miRNAs          | 2 <sup>-ΔΔCt</sup> value compare (Mean ± SD) |                      | <i>p</i> value |
|-----|-----------------|----------------------------------------------|----------------------|----------------|
|     |                 | Melanoma group                               | Pigmented nevi group |                |
| 1   | hsa-miR-424-5p  | 3.580 ± 2.759                                | 1.123 ± 0.529        | <0.0001*       |
| 2   | hsa-miR-497-5p  | 0.492 ± 0.371                                | 1.082 ± 0.441        | <0.0001*       |
| 3   | hsa-miR-195-5p  | 0.629 ± 0.317                                | 1.047 ± 0.336        | <0.0001*       |
| 4   | hsa-miR-16-5p   | 0.936 ± 0.520                                | 1.064 ± 0.385        | 0.240          |
| 5   | hsa-miR-15a-5p  | 0.966 ± 0.568                                | 1.139 ± 0.681        | 0.247          |
| 6   | hsa-miR-15b-5p  | 0.930 ± 0.514                                | 1.092 ± 0.447        | 0.156          |
| 7   | hsa-miR-338-3p  | 1.409 ± 0.962                                | 1.089 ± 0.474        | 0.078          |
| 8   | hsa-miR-107     | 1.019 ± 0.818                                | 1.051 ± 0.308        | 0.828          |
| 9   | hsa-miR-103a-3p | 0.963 ± 0.483                                | 1.053 ± 0.333        | 0.356          |
| 10  | hsa-miR-143-3p  | 1.120 ± 0.898                                | 1.140 ± 0.578        | 0.911          |
| 11  | hsa-miR-212-5p  | 2.112 ± 1.295                                | 1.217 ± 0.792        | 0.001*         |
| 12  | hsa-miR-1306-5p | 1.022 ± 0.602                                | 1.095 ± 0.564        | 0.597          |
| 13  | hsa-miR-665     | 1.138 ± 0.825                                | 1.071 ± 0.473        | 0.671          |
| 14  | hsa-miR-455-3p  | 0.271 ± 0.266                                | 1.136 ± 0.528        | <0.0001*       |

\*Statistically significant.

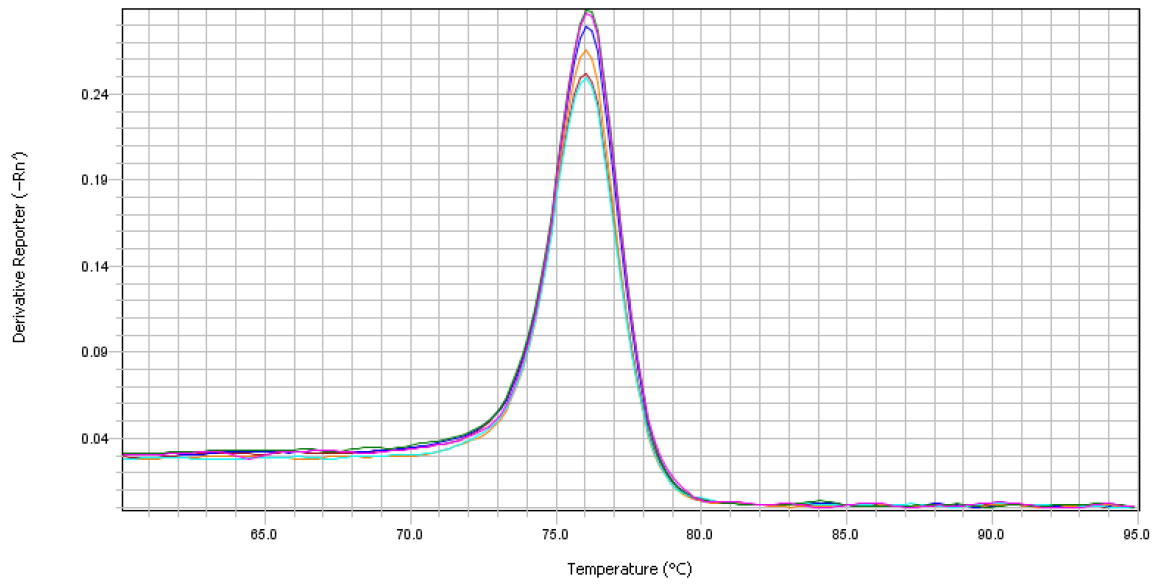

miR-15a-5p

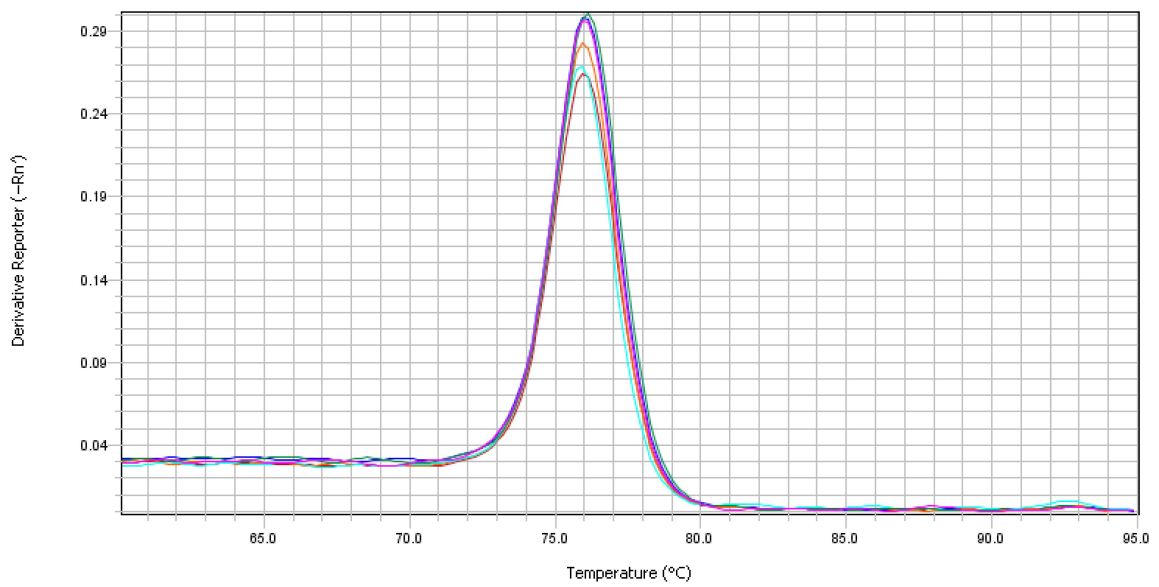

miR-15b-5p

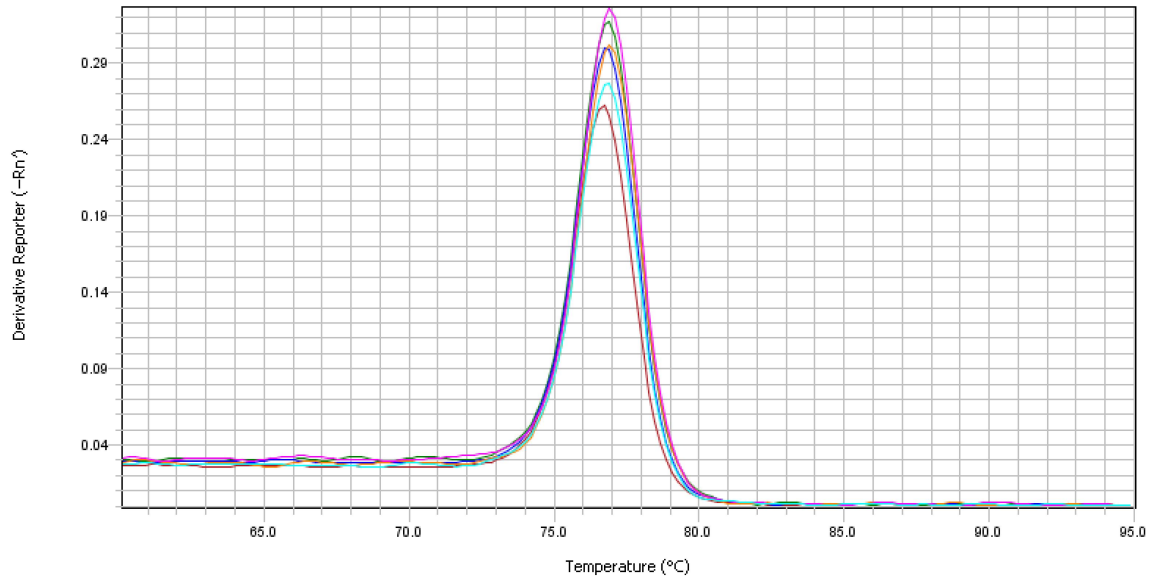

miR-16-5p

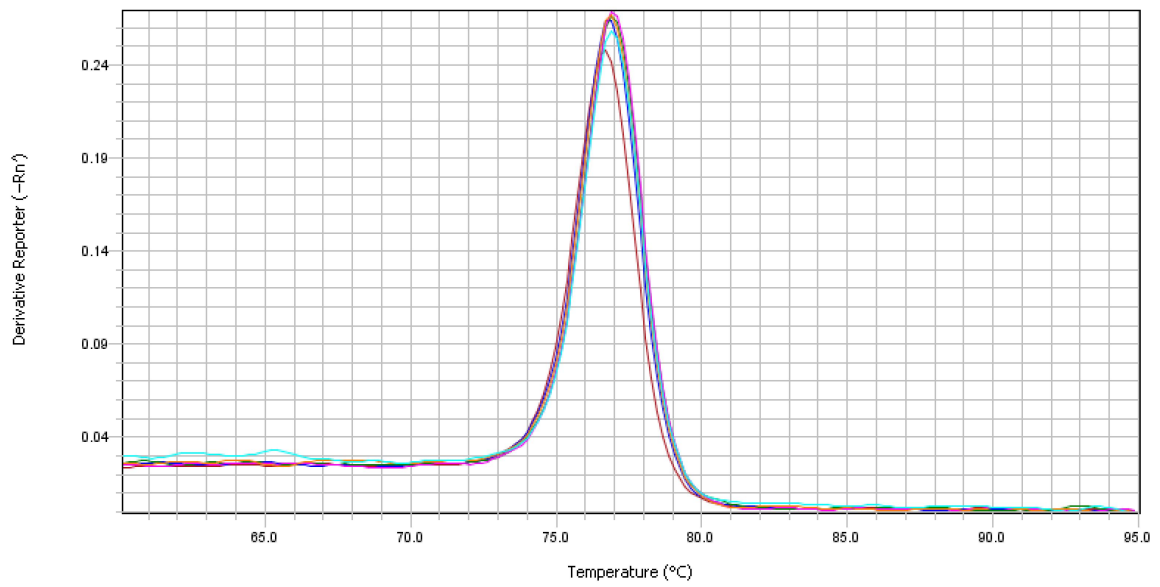

miR-103a-3p

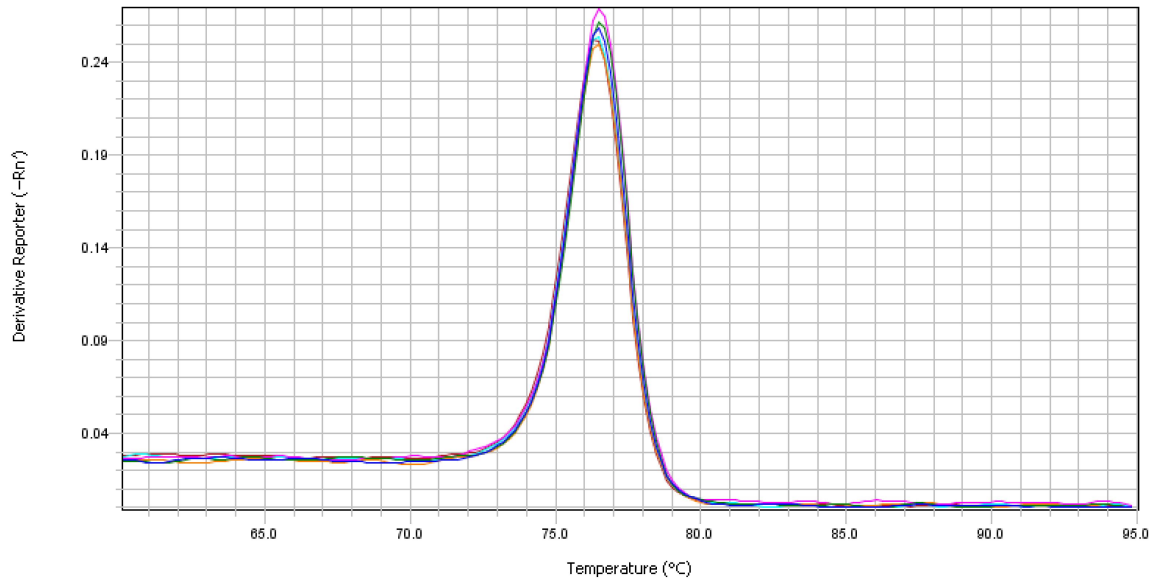

miR-107

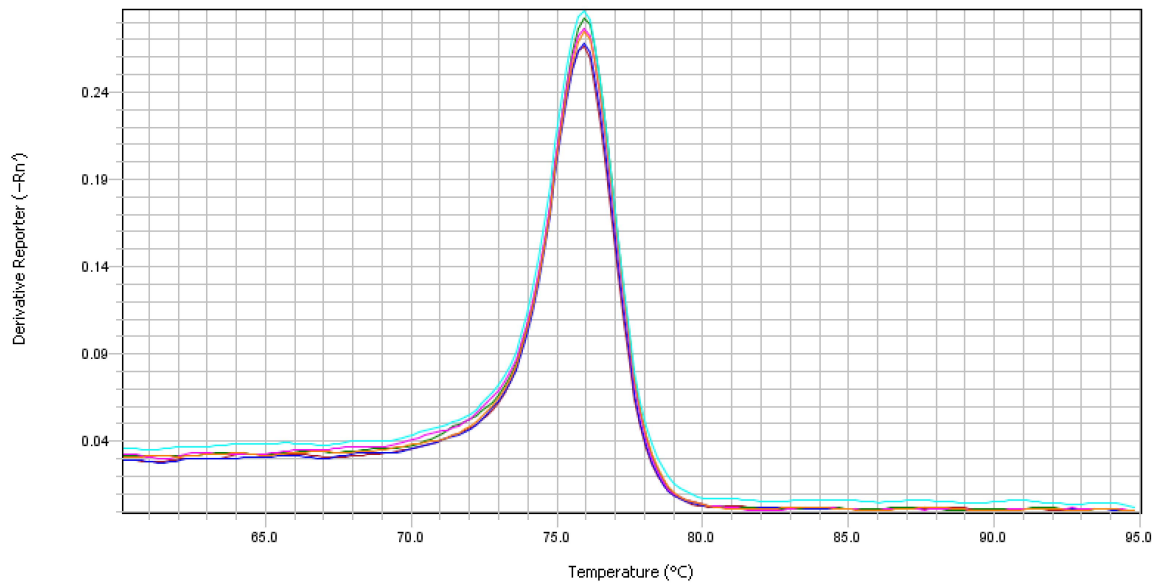

miR-143-3p

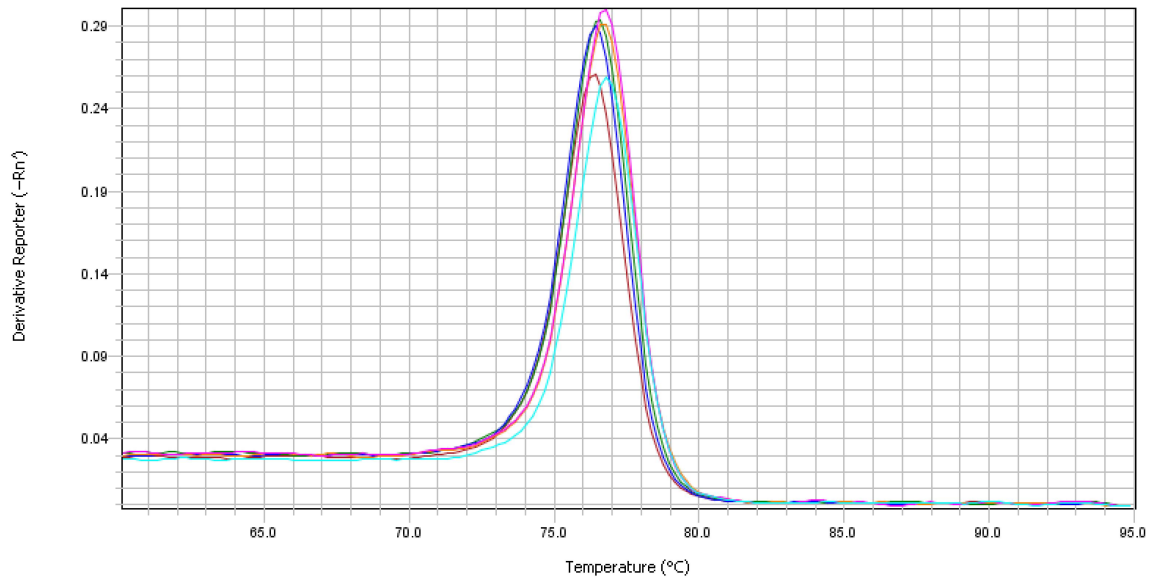

miR-195-5p

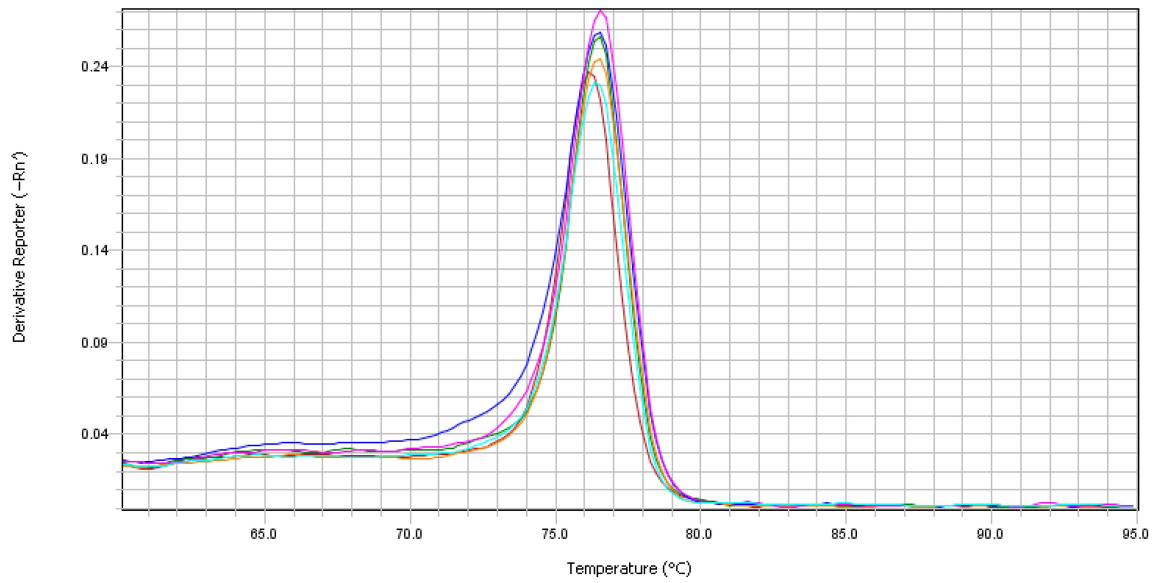

miR-212-5p



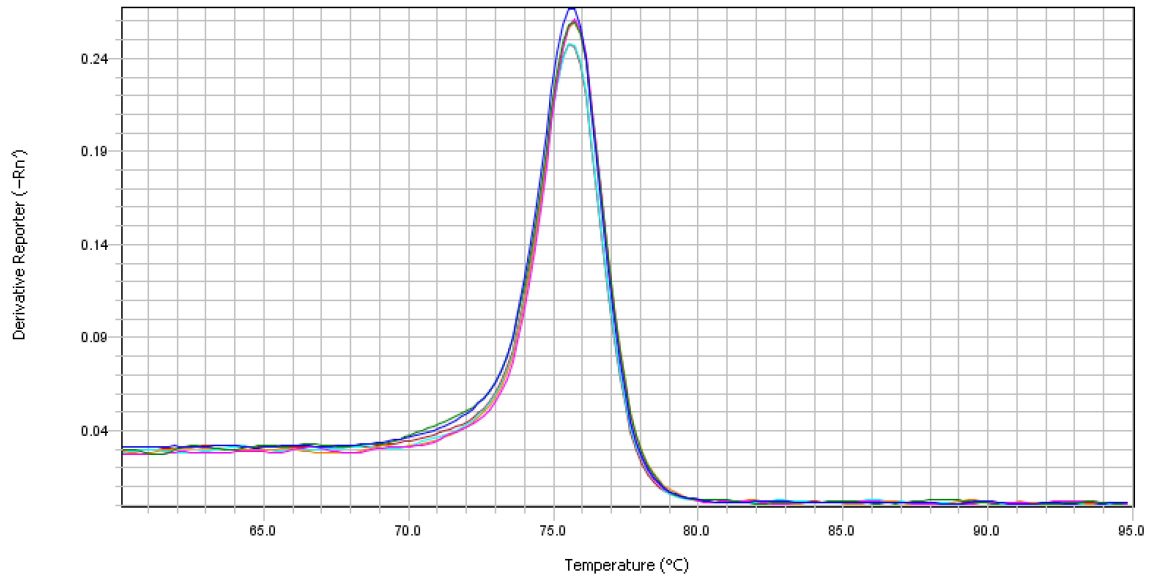

miR-338-3p

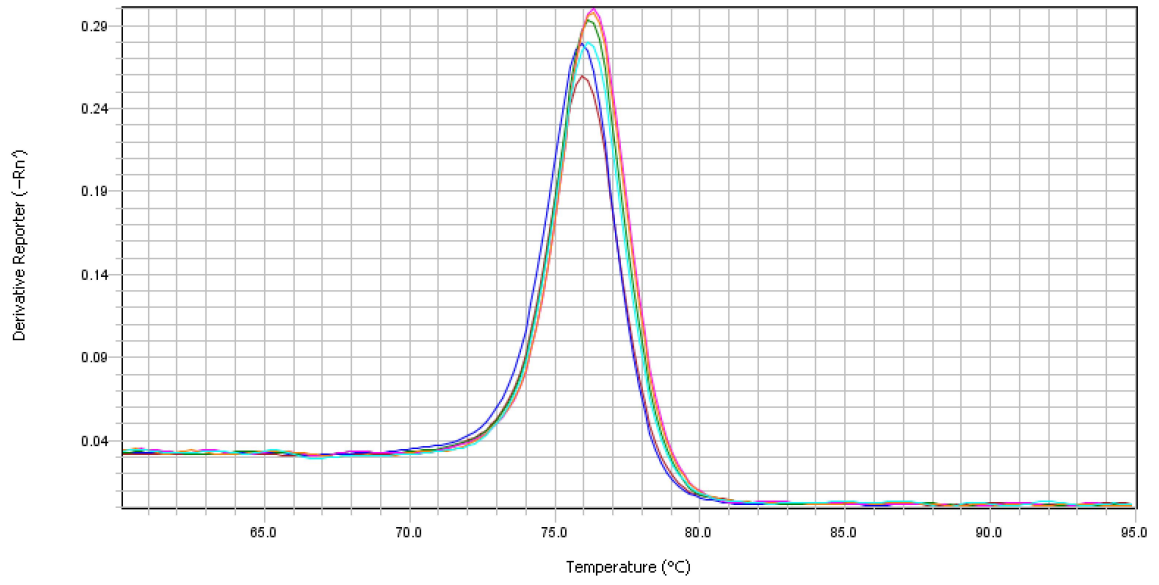

miR-424-5p

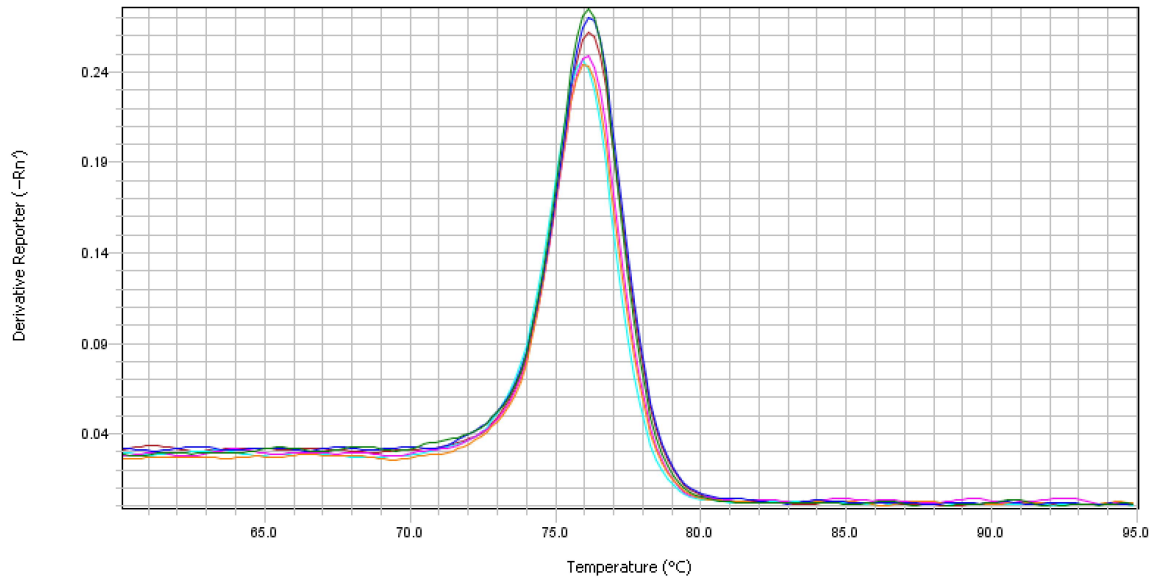

miR-455-3p

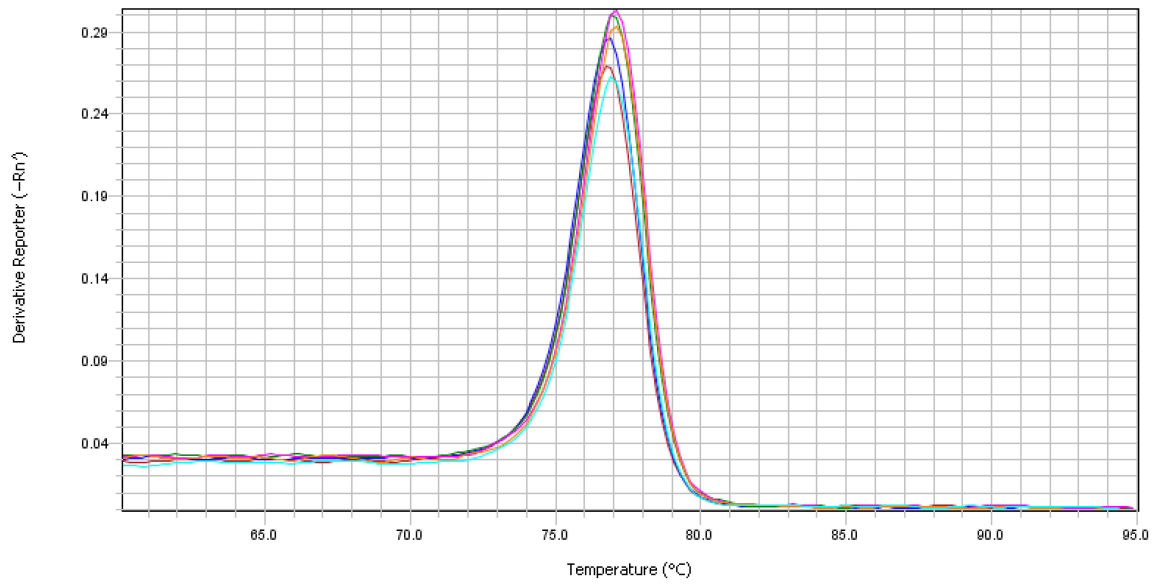

miR-497-5p

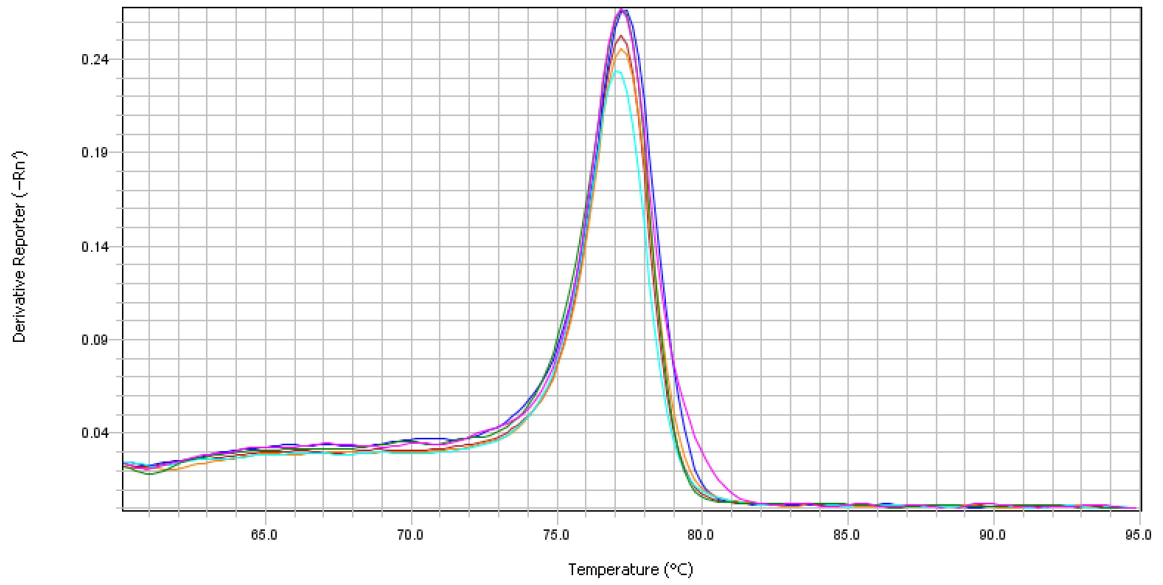

miR-665

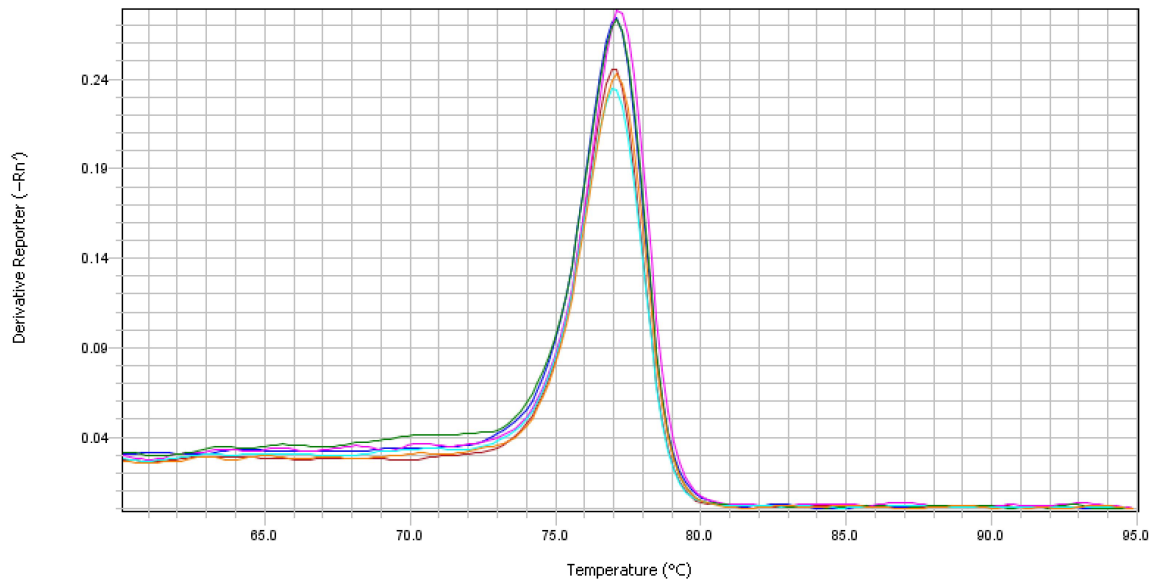

miR-1306-5p

Supplementary Figure 1 The melt curves of 14 candidate miRNAs.

Normal cell group

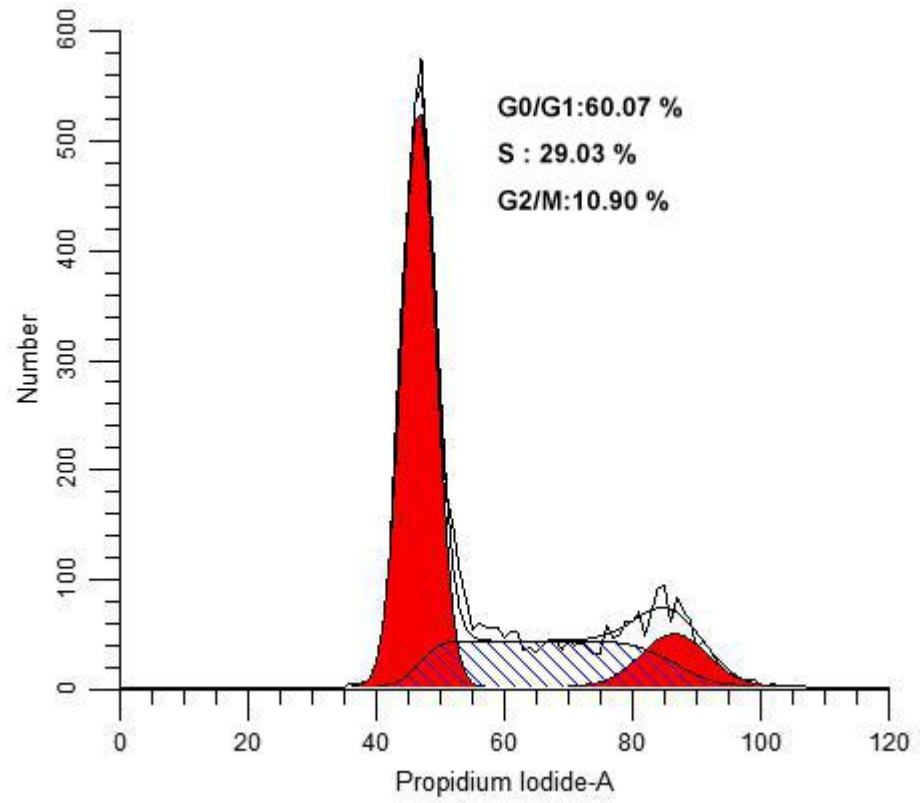

Mimics NC

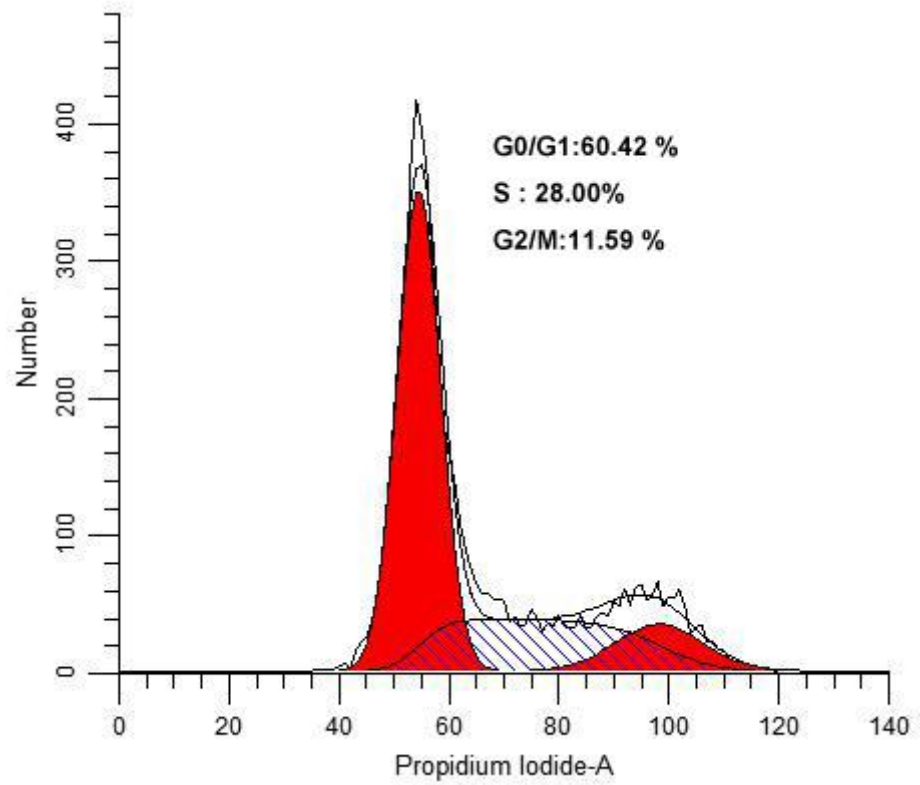

Inhibitor NC

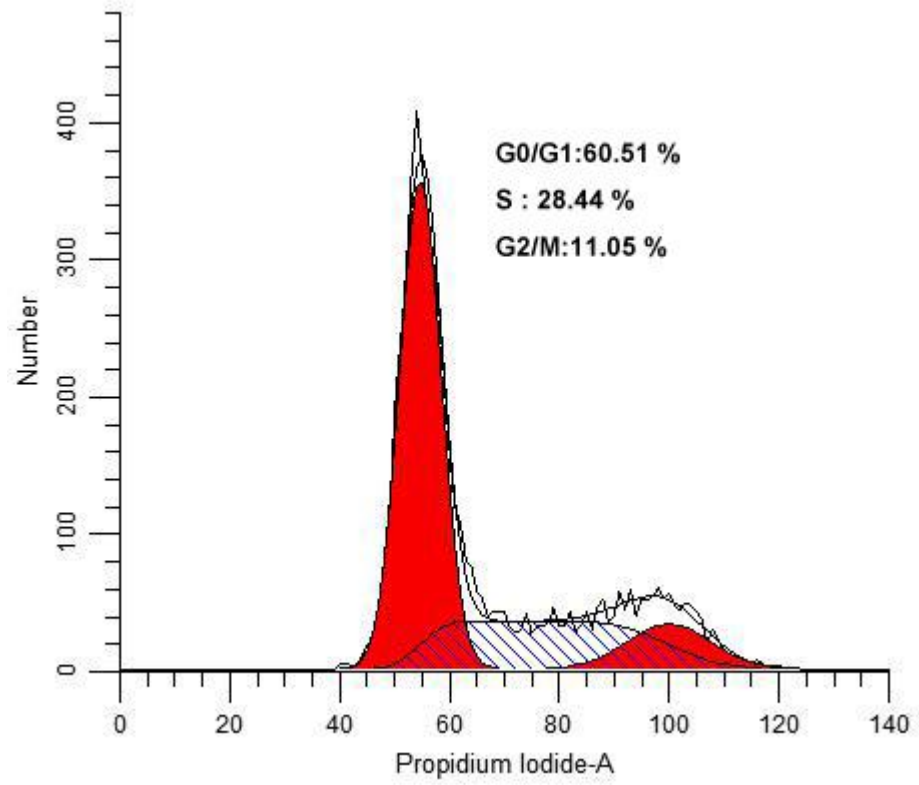

MiR-497-5p  
mimics

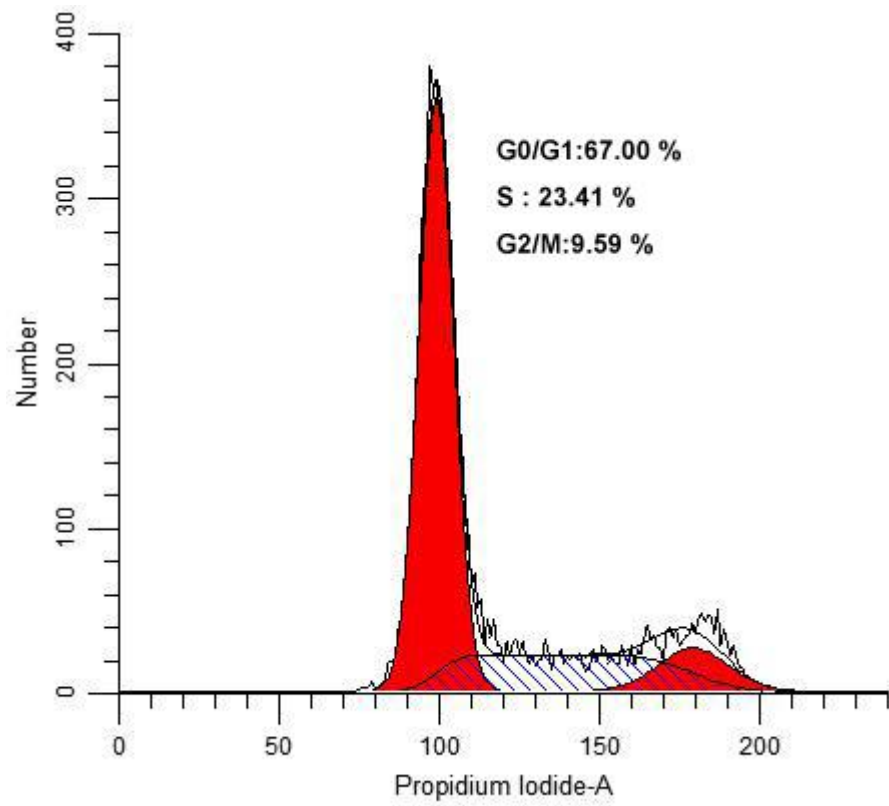

MiR-497-5p  
inhibitor

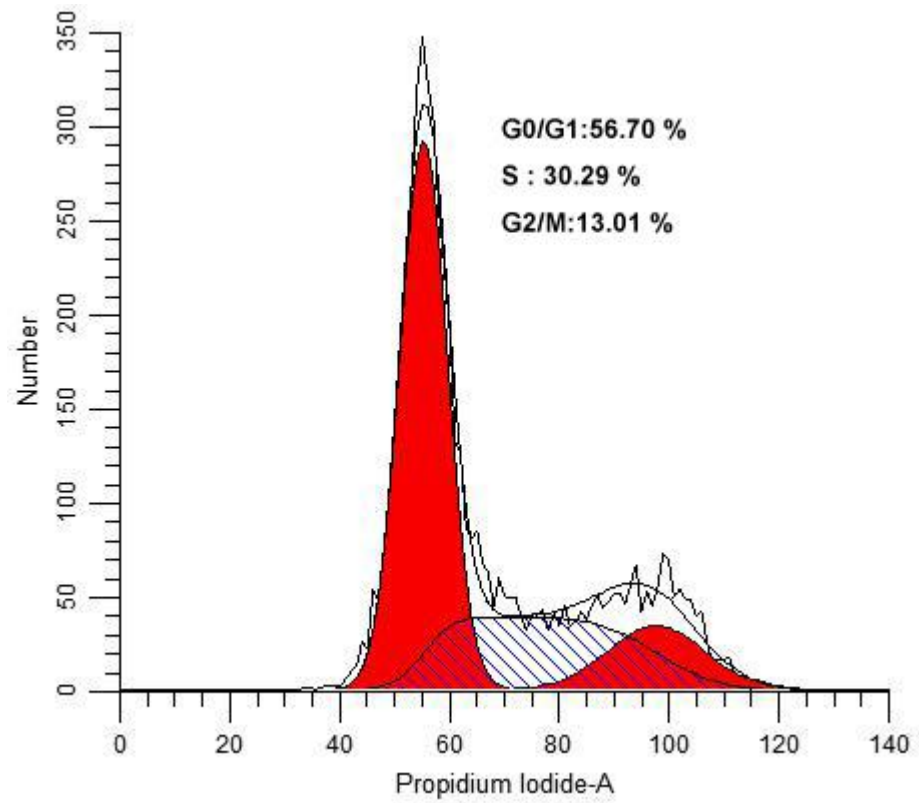

MiR-195-5p  
mimics

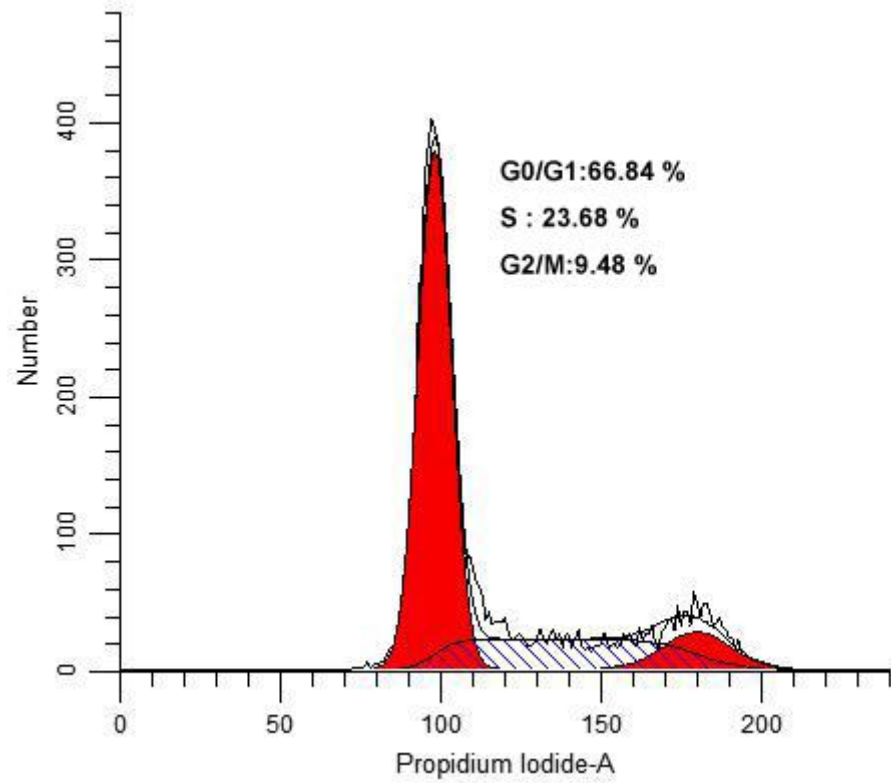

MiR-195-5p  
inhibitor

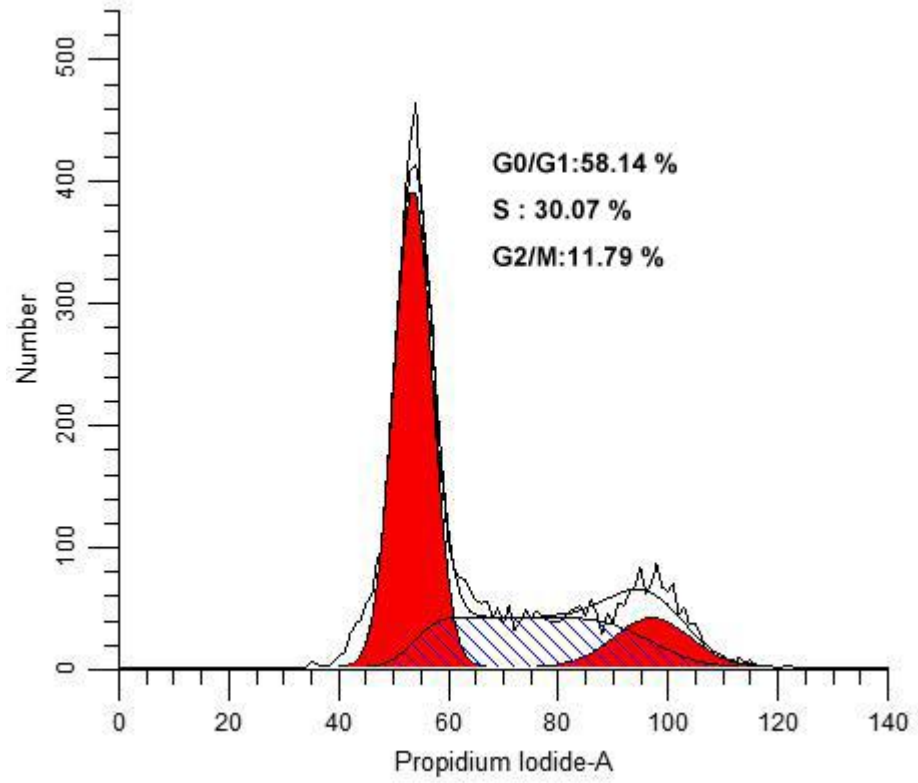

MiR-455-3p  
mimics

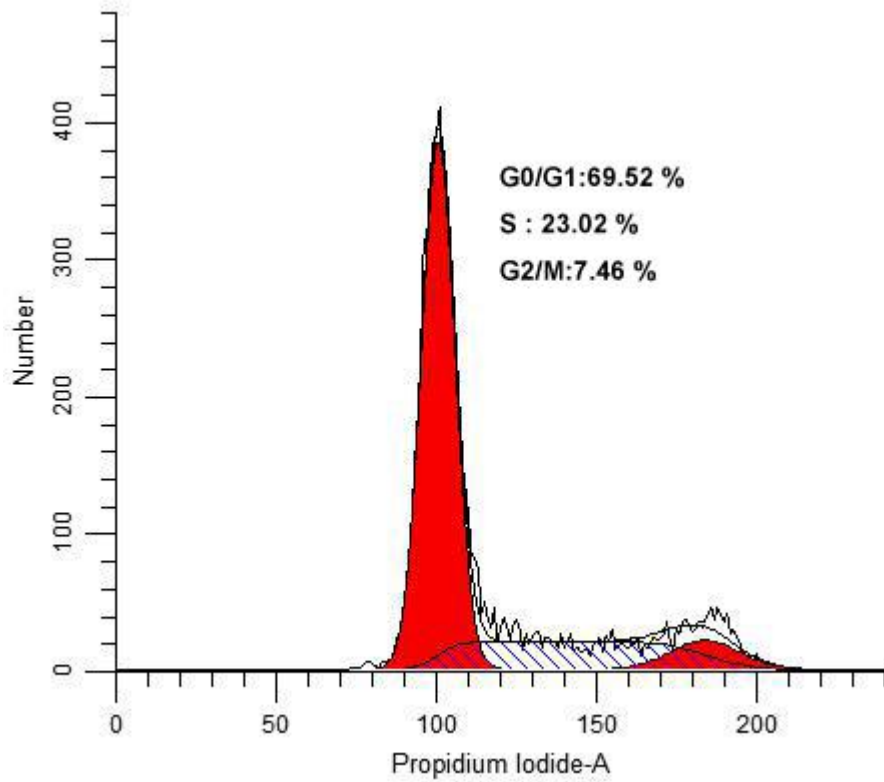

MiR-455-3p  
inhibitor

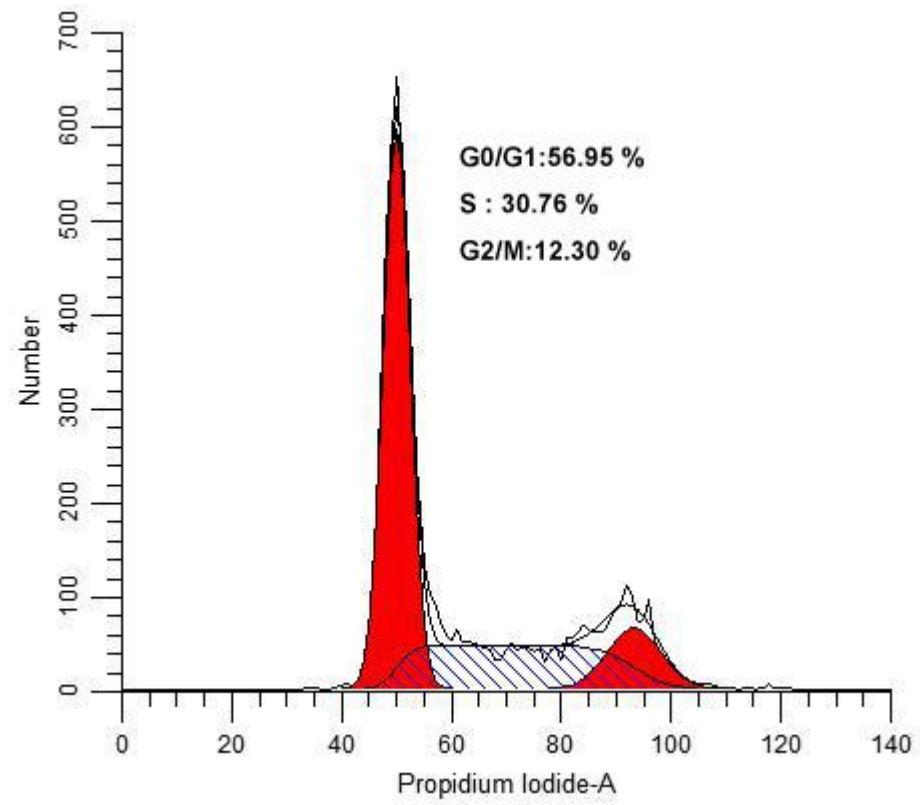

Supplementary Figure 2 The cell cycle histograms of each group.
